# Supplementary material
Source: ML conference proceedings conference paper supplement (https://openaccess.thecvf.com/content/CVPR2025/html/Choi_Exploiting_Deblurring_Networks_CVPR_2025_paper.html)
Supplement: Supplementary file 1 [file Choi_Exploiting_Deblurring_Networks_CVPR_2025_supplemental.pdf]

# Exploiting Deblurring Networks for Radiance Fields

## Supplementary Material

### S1. Overview

In this supplementary material, we provide additional implementation details of DeepDeblurRF-P and DeepDeblurRF-G, details on generating the BlurRF-Synth dataset, and additional experimental results. Specifically, we provide:

- Additional implementation details
- Blender rendering configurations
- Blender license information
- Ablation study on DeepDeblurRF-P
- Description for supplementary video
- Additional comparison results

### S2. Additional Implementation Details

With iteration number of  $N = 5$ , DeepDeblurRF consists of one single-image deblurring network and four RF-guided deblurring networks for each blur type: camera motion blur and defocus blur. These networks are denoted as  $\mathcal{D}_s$ ,  $\mathcal{D}_g^1$ ,  $\mathcal{D}_g^2$ ,  $\mathcal{D}_g^3$ , and  $\mathcal{D}_g^4$ , respectively. The deblurred outputs from each network are used as inputs in each radiance field construction step to train  $\mathbf{V}^{i \in \{1, \dots, 5\}}$ , respectively.

DeepDeblurRF-P and DeepDeblurRF-G share only the single-image deblurring network,  $\mathcal{D}_s$ , which adopts the network of NAFNet-32 [1]. The RF-guided deblurring networks are trained independently for each of DeepDeblurRF-P and DeepDeblurRF-G to fully reflect the rendering results of Plenoxels [2] and 3D Gaussian splatting (3DGS) [3]. For camera motion blur,  $\mathcal{D}_s$  is trained for 223 epochs with a batch size of 32, while for defocus blur, it is trained for 53 epochs with the same batch size. The RF-guided deblurring networks use NAFNet-64 with a batch size of 32 and are trained separately for DeepDeblurRF-P and DeepDeblurRF-G.

#### S2.1. DeepDeblurRF-P

For RF-guided deblurring networks,  $\mathcal{D}_g^1$ ,  $\mathcal{D}_g^2$ ,  $\mathcal{D}_g^3$ , and  $\mathcal{D}_g^4$  are trained for 25, 53, 43, and 20 epochs for camera motion blur, and 25, 14, 25, and 11 epochs for defocus blur. The networks  $\mathcal{D}_g^1$ ,  $\mathcal{D}_g^2$ , and  $\mathcal{D}_g^3$  use the PSNR loss [1], while  $\mathcal{D}_g^4$  additionally incorporates the perceptual loss from Real-ESRGAN [12] to enhance deblurring quality.

For radiance field construction, we adopt the forward-facing experimental setting of Plenoxels [2]. They begin with a voxel resolution of  $256 \times 256 \times 128$ , with upsampling performed every 38,400 steps, progressing to resolutions of  $512 \times 512 \times 128$  and finally reaching  $1408 \times 1156 \times 128$ . In our implementation, for  $\mathbf{V}^1$  to  $\mathbf{V}^4$ , we adjust this scheme to start at a lower resolution of  $128 \times 128 \times 128$ , increasing

to  $256 \times 256 \times 256$ , and then  $512 \times 512 \times 256$ . This adjustment accelerates training while progressively capturing finer details. However, for the final radiance field construction step,  $\mathbf{V}^5$ , we revert to the original settings to achieve optimal novel-view synthesis performance.

We utilize the default settings for the remaining hyperparameters. Specifically, learning rates are set to  $3 \times 10^{-1}$  for sigma and  $1 \times 10^{-2}$  for spherical harmonics, with total variation regularization values of  $5 \times 10^{-4}$  for density and  $5 \times 10^{-3}$  for spherical harmonics, along with a sparsity regularization of  $1 \times 10^{-12}$ . We optimize  $\mathbf{V}^1$  for 51,200 iterations and  $\mathbf{V}^2$  for 76,800 iterations, each with a batch size of 5k rays. For  $\mathbf{V}^3$ ,  $\mathbf{V}^4$ , and  $\mathbf{V}^5$ , we extend optimization to 102,400 iterations with the same batch size.

#### S2.2. DeepDeblurRF-G

The RF-guided deblurring networks,  $\mathcal{D}_g^1$ ,  $\mathcal{D}_g^2$ ,  $\mathcal{D}_g^3$ , and  $\mathcal{D}_g^4$ , are trained for 53, 254, 254 and 33 epochs for camera motion blur, and 42, 42, 50 and 11 epochs for defocus blur. As with DeepDeblurRF-P,  $\mathcal{D}_g^1$ ,  $\mathcal{D}_g^2$ , and  $\mathcal{D}_g^3$  use the PSNR loss [1], while  $\mathcal{D}_g^4$  also incorporates the perceptual loss from Real-ESRGAN [12] to enhance deblurring quality.

For the radiance field construction step of DeepDeblurRF-G, we employ the training scheme of the 3DGS [3]. We use the Adam optimizer and set the learning rate for the position of 3D Gaussians to  $1.6 \times 10^{-4}$ , the pruning threshold to  $5 \times 10^{-3}$ , and the densification threshold to  $2 \times 10^{-4}$ . However, since 3DGS assumes clean input images, adopting its training scheme in our framework may result in sparse and incomplete Gaussian point clouds. To address this, we incorporate the sparse point cloud compensation strategy of Deblur-GS [4] that performs depth-based pruning and adds extra Gaussian points. We use the hyperparameters proposed by Deblur-GS for the compensation strategy. We refer the readers to [4] for more details on the compensation strategy. We optimize  $\mathbf{V}^1$  to  $\mathbf{V}^4$  for 10,000 iterations each, and then extend the optimization for  $\mathbf{V}^5$  to 20,000 iterations to capture finer scene details.

#### S2.3. Training Details

The deblurring networks are sequentially trained: train the initial deblurring network, construct RFs, render guidance images, and train the first RF-guided deblurring network. We present the pseudocode for the entire training procedure of DeepDeblurRF to provide a clearer understanding of the overall process.



---

**Algorithm 1** DeepDeblurRF Training

---

**Require:** A training dataset containing  $N$  scenes  $H = \{H_1, H_2, \dots, H_N\}$ . Each scene  $H_h$  consists of  $M$  blurred images  $B = \{B_1, B_2, \dots, B_M\}$  and their corresponding sharp images  $S = \{S_1, S_2, \dots, S_M\}$ .

**Ensure:** A set of trained deblurring network weights:

- $W_0$ : Initial deblurring network weight.
- $\{W_1, W_2, \dots, W_T\}$ : RF-guided deblurring network weights.

- 1: **Initialize:**
- 2: Initialize initial deblurring network weight  $W_0$
- 3: Initialize RF-guided deblurring network weights  $\{W_1, W_2, \dots, W_T\}$
- 4: Initialize deblurred images  $D_{h,i} \leftarrow \emptyset$  for all  $h, i$
- 5: **Initial deblurring network training:**
- 6: **for** each scene  $h = 1$  to  $N$  **do**
- 7:   **for**  $i = 1$  to  $M$  **do**
- 8:      $D_{h,i} \leftarrow \text{Deblur}(B_{h,i}, W_0)$  ▷ Deblur using  $W_0$
- 9:     Compute loss  $L_0$  using  $S_{h,i}$  and  $D_{h,i}$
- 10:     Update  $W_0$  using optimizer with  $\nabla L_0$  ▷ Train initial deblurring network
- 11:   **end for**
- 12: **end for**
- 13: **Radiance Field (RF) & RF-guided Deblurring Network Training:**
- 14: **for**  $t = 1$  to  $T$  **do** ▷ Iterate through each RF-guided deblurring network
- 15:   **for** each scene  $h = 1$  to  $N$  **do**
- 16:     **if**  $t = 1$  **then** ▷ Initial deblurring
- 17:        $D_{h,1}, D_{h,2}, \dots, D_{h,M} \leftarrow \text{Deblur}(B_h, W_0)$
- 18:     **else** ▷ RF-guided deblurring
- 19:        $D_{h,1}, D_{h,2}, \dots, D_{h,M} \leftarrow \text{Deblur}(B_h, R_h, W_{t-1})$
- 20:     **end if**
- 21:     Obtain camera poses  $P_h$  using COLMAP from  $D_h$  ▷ Estimate camera poses for RF training
- 22:     Train radiance field  $\text{RF}_h$  using  $D_h$  and  $P_h$
- 23:     Render images  $R_{h,1}, R_{h,2}, \dots, R_{h,M}$  from  $\text{RF}_h$  at input view poses
- 24:   **end for**
- 25:   **for** each scene  $h = 1$  to  $N$  **do** ▷ Train the  $t$ -th RF-guided deblurring network
- 26:      $D_h \leftarrow \text{Deblur}(B_h, R_h, W_t)$
- 27:     Compute loss  $L_t$  using  $S_h$  and  $D_h$
- 28:     Update  $W_t$  using optimizer with  $\nabla L_t$
- 29:   **end for**
- 30: **end for**
- 31: **Final deblurring network weights:**
- 32: **return**  $W_0$  and  $\{W_1, W_2, \dots, W_T\}$  ▷ Return trained network weights for deblurring and novel view synthesis

---

### S3. Details on the BlurRF-Synth Dataset

In this section, we describe the details of the Blender rendering configurations and the licensing of Blender models used to generate the BlurRF-Synth dataset.

#### S3.1. Blender Rendering Configurations

We modify the Blender script provided by Deblur-NeRF [7] to render sharp and blurred images. To accurately model the real-world blur formation process, we configure the color management settings to use the ‘RAW’ color profile to render images in the linear sRGB space. Additionally, we set the `Look` setting to ‘None’ to avoid any contrast-related

transformations, and compositing is disabled in the output settings to avoid non-linear transformations. We manually sample 29 camera poses for each model to capture different viewpoints, and for the test set, we include 5 additional poses to evaluate novel-view synthesis quality.

Examples are shown in Fig. S1. In each row, the left images show the 34 sampled camera poses, with blue lines representing the defined camera paths, white dots indicating the sampled camera positions, and orange numbers labeling some of the poses. The rectangle in each left image represents the current camera, corresponding to the rectangle framing the scene in the right image. The image within the rectangle on the right shows the view rendered from this



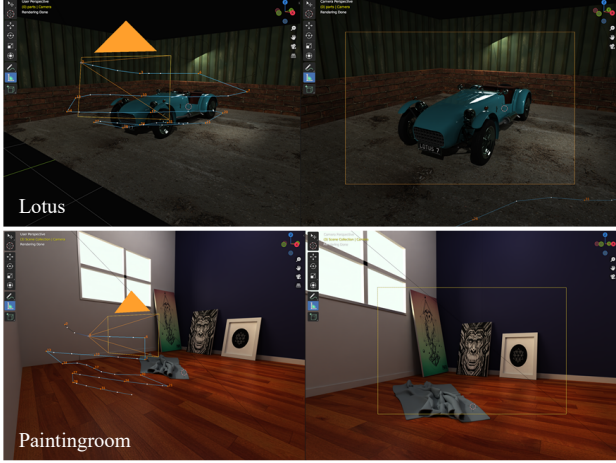

Figure S1. Examples of Blender models used for synthesizing the test sets of BlurRF-Synth.

camera position. The darker appearance is due to the RAW color profile used for rendering.

**Camera motion blur** To simulate camera shakes, we take each of the 29 original camera poses as the starting camera position ( $\mathbf{P}_0$ ) and apply a perturbation to determine the final camera position ( $\mathbf{P}_3$ ) during the exposure time. This perturbation is applied along a random direction vector ( $\mathbf{D}$ ), with its magnitude constrained by predefined limits adjusted according to the scene’s scale. We then interpolate between these camera positions using a Bézier curve to create smooth camera motion. The Bézier curve is defined as:

$$\mathbf{B}(t) = (1-t)^3\mathbf{P}_0 + 3(1-t)^2t\mathbf{P}_1 + 3(1-t)t^2\mathbf{P}_2 + t^3\mathbf{P}_3,$$

where  $\mathbf{P}_0$  represents the original camera pose,  $\mathbf{P}_3$  is the perturbed position, and  $\mathbf{P}_1$  and  $\mathbf{P}_2$  are control points that shape the camera motion trajectory. The control points  $\mathbf{P}_1$  and  $\mathbf{P}_2$  are computed based on a normal direction to the vector  $\mathbf{D}$ , which represents the camera’s movement direction. Specifically, we calculate a perpendicular normal vector to  $\mathbf{D}$  and adjust the depth of  $\mathbf{P}_1$  and  $\mathbf{P}_2$  independently. These depths are randomized within predefined ranges proportional to the scene scale, introducing variation in the curve. This ensures that each control point depth varies, resulting in more realistic camera movements.

Using this method, we render 51 sharp images per camera pose. The 26th image, the temporally central frame, is used as the ground truth sharp image, while all 51 frames are combined to generate realistic blurred images following the RSBlur [10] pipeline. The full Blender script will be released to ensure reproducibility and to enable further experimentation.

**Defocus blur** To generate realistic defocus blur, we adjust the camera’s depth of field (DoF) settings for each of the 29 camera poses. By varying the camera’s aperture and

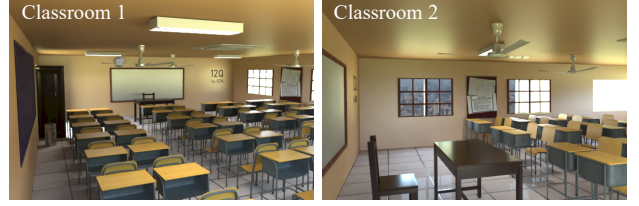

Figure S2. Example view of scenes ‘Classroom 1’ and ‘Classroom 2’. These scenes are rendered from the same Blender model but use different sets of camera poses.

focal distance, we simulate different levels of defocus blur. Specifically, we enable the depth of field effect and adjust the aperture using the  $f\text{-stop}$  value to control the amount of blur. A lower  $f\text{-stop}$  value opens the aperture wider, allowing more light and creating a shallower depth of field, which increases the blur effect. Conversely, a higher  $f\text{-stop}$  value narrows the aperture, resulting in a deeper depth of field and reducing the blur. For each camera pose, we randomly adjust the focal distance within a predefined range to simulate varying degrees of defocus blur across frames.

Additionally, to capture diverse bokeh shapes, we randomly set the number of aperture blades between 7 and 9 for each scene, affecting the shape of the bokeh effect in the rendered images. Unlike camera motion blur synthesis, which combines multiple frames, defocus blur synthesis renders a single image per camera pose by directly adjusting the DoF settings to generate blurred images. After rendering in linear sRGB space, we apply the RSBlur [10] pipeline to introduce shot noise and sensor read noise, as done in the camera motion blur process. The full Blender script will also be released to ensure reproducibility and to enable further experimentation.

### S3.2. Blender Asset Licenses

We synthetically generated our dataset using Blender models. Specifically, we collected 95 models from Blendswap<sup>1</sup> under Creative Commons licenses and sourced an additional 5 models from the synthetic dataset used in Deblur-NeRF [7]. Tab. S4 and Tab. S5 provide detailed information on each model, including the author, license type, and download link. Moreover, we specify whether each model was used to simulate camera motion blur or defocus blur, as well as whether it was included in the training set or the test set. To distinguish between scenes generated from the same model but with different sets of camera poses, we append numerical identifiers to the scene names. Examples are shown in Fig. S2.

<sup>1</sup>[blendswap.com/](https://blendswap.com/)



| Model           | BlurRF-Real<br>(Camera Motion Blur) |          |           | Deblur-NeRF [7]<br>(Camera Motion Blur) |          |           | Deblur-NeRF [7]<br>(Defocus Blur) |          |           | Computation<br>Time (Hr.) |
|-----------------|-------------------------------------|----------|-----------|-----------------------------------------|----------|-----------|-----------------------------------|----------|-----------|---------------------------|
|                 | PSNR (↑)                            | SSIM (↑) | LPIPS (↓) | PSNR (↑)                                | SSIM (↑) | LPIPS (↓) | PSNR (↑)                          | SSIM (↑) | LPIPS (↓) |                           |
| MLP             |                                     |          |           |                                         |          |           |                                   |          |           |                           |
| Deblur-NeRF [7] | 21.31                               | 0.3845   | 0.5512    | 25.62                                   | 0.7645   | 0.1825    | 23.34                             | 0.7191   | 0.1191    | 31.33                     |
| BAD-NeRF [11]   | 17.75                               | 0.2279   | 0.7529    | 17.37                                   | 0.3044   | 0.5806    | -                                 | -        | -         | 24.68                     |
| DP-NeRF [5]     | 21.17                               | 0.3789   | 0.5378    | 25.91                                   | 0.7549   | 0.1638    | 23.60                             | 0.7278   | 0.1072    | 30.00*                    |
| Voxel grid      |                                     |          |           |                                         |          |           |                                   |          |           |                           |
| ExBluRF [6]     | 18.93                               | 0.3137   | 0.6702    | 22.97                                   | 0.6787   | 0.2222    | -                                 | -        | -         | 8.92                      |
| PDRF-10 [8]     | 21.37                               | 0.3774   | 0.5759    | 25.87                                   | 0.7685   | 0.2049    | 23.73                             | 0.7356   | 0.1084    | 4.26                      |
| DeepDeblurRF-P  | 24.20                               | 0.4833   | 0.4751    | 25.96                                   | 0.7922   | 0.1521    | 23.49                             | 0.7479   | 0.1067    | 1.14                      |
| 3D Gaussians    |                                     |          |           |                                         |          |           |                                   |          |           |                           |
| Deblur-GS [4]   | 20.20                               | 0.3461   | 0.5026    | 25.53                                   | 0.7870   | 0.1234    | 23.42                             | 0.7367   | 0.1146    | 0.33                      |
| BAGS [9]        | 22.87                               | 0.4333   | 0.4883    | 26.18                                   | 0.7985   | 0.1185    | 23.50                             | 0.7469   | 0.1040    | 1.25                      |
| DeepDeblurRF-G  | 24.59                               | 0.4895   | 0.4495    | 26.82                                   | 0.8141   | 0.1182    | 23.82                             | 0.7484   | 0.0951    | 0.28                      |

Table S1. Quantitative comparison of novel-view synthesis on BlurRF-Real and real-world scenes from Deblur-NeRF [7]. We highlight the best metrics and the second best metrics. As discussed in Sec. 5, training times were measured using the BlurRF-Synth camera motion blur test set. Note that due to its high memory demands, DP-NeRF [5] was trained with two GPUs, while all other models were trained on a single NVIDIA TITAN RTX GPU.

| # Iter. | Camera motion |        |        | Defocus |        |        |
|---------|---------------|--------|--------|---------|--------|--------|
|         | PSNR          | SSIM   | LPIPS  | PSNR    | SSIM   | LPIPS  |
| $N = 1$ | 28.04         | 0.8068 | 0.1989 | 30.51   | 0.8660 | 0.1711 |
| $N = 2$ | 28.99         | 0.8400 | 0.1697 | 31.03   | 0.8751 | 0.1538 |
| $N = 3$ | 29.47         | 0.8576 | 0.1405 | 32.03   | 0.8964 | 0.1278 |
| $N = 4$ | 29.75         | 0.8657 | 0.1247 | 32.31   | 0.9025 | 0.1055 |
| $N = 5$ | 29.81         | 0.8668 | 0.1142 | 32.51   | 0.9058 | 0.0961 |
| $N = 6$ | 29.85         | 0.8690 | 0.1124 | 32.74   | 0.9077 | 0.0947 |

Table S2. Quantitative results of ablation study on the number of iterations  $N$  for the test sets of BlurRF-Synth.

## S4. Additional Experimental Results

### S4.1. Ablation Study on DeepDeblurRF-P

In Sec. 5, we presented both quantitative and qualitative results of the ablation study on the number of iterations  $N$  for DeepDeblurRF-G. In this section, we extend the same ablation study to DeepDeblurRF-P. Tab. S2 shows that the novel-view synthesis performance of DeepDeblurRF-P improves as  $N$  increases. While our models generally achieve optimal performance at  $N = 5$ , we observed that in some scenes, both DeepDeblurRF-P and DeepDeblurRF-G converge earlier, around  $N = 3$  or  $N = 4$ . This suggests that although  $N = 5$  is a robust setting for most cases, fewer iterations can achieve comparable results in specific scenes, as illustrated in Fig. S3.

### S4.2. Description for Supplementary Video

Our supplementary video presents novel-view synthesis results across various datasets, including comparisons with other models. For ray-based methods [5, 8], we used the official code provided for video generation. For 3D Gaussians-based methods [4, 9], which did not provide such code, we generated novel views by randomly sampling and interpolat-

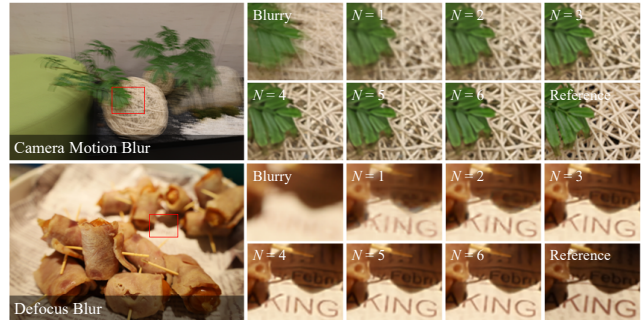

Figure S3. Qualitative results of ablation study on the number of iterations  $N$  for real-world scenes of the Deblur-NeRF [7].

ing camera poses from the training views.

DeepDeblurRF performs high-quality novel-view synthesis on the BlurRF-Synth dataset and real-world datasets of the Deblur-NeRF [7], both of which contain scenes with camera motion blur and defocus blur.

On the BlurRF-Real dataset, which contains camera motion blur scenes under challenging low-light conditions, DeepDeblurRF also outperforms other methods, which produce noisy or blurred results.

Furthermore, other methods fail to effectively remove blur in the BlurRF-SB dataset, where all training views contain camera motion blur in the same direction but with varying intensities. This is due to the reliance of previous approaches on the assumption that input blurred images contain complementary information from different blur directions, which does not hold in the BlurRF-SB dataset. In contrast, our methods produce sharp and clear novel views, demonstrating the advantage of leveraging prior knowledge on sharp images obtained from pre-trained deblurring networks.



### S4.3. Additional Comparison Results

We report experimental results on the benchmark Deblur-NeRF [7] datasets. Notably, benchmark datasets do not reflect challenging low-light conditions where blur often occurs. Instead, they contain minimal noises, thus are highly favorable to previous methods that rely on linear blur models. For a comprehensive evaluation, we retrained our model with minimal noise. The results are reported in Tab. S1 and Tab. S3. As discussed in Sec. 5, the blur-free reference images for the real-world datasets are not fully consistent with the training views due to differences in calibration and exposure, making precise quantitative evaluation challenging. Therefore, we report the quantitative results in the supplementary material for further reference.

Tab. S1 presents the results, evaluated using full-reference quality metrics. On the BlurRF-Real dataset, both DeepDeblurRF-P and DeepDeblurRF-G outperform existing models across all metrics. This is further highlighted in the qualitative results shown in Fig. S4, where other methods struggle with real-world non-linear artifacts, such as noise in low-light conditions, while our models perform high-quality novel-view synthesis.

Similarly, on the Deblur-NeRF [7] datasets, our models exhibit superior performance with significantly shorter computation times. For camera motion blur, DeepDeblurRF-G achieves superior performance in both synthetic and real-world scenes, while requiring less computation time. For defocus blur, DeepDeblurRF-G demonstrates a notable advantage in the LPIPS metric, reflecting its superior perceptual quality. DeepDeblurRF-P also surpasses other MLP and Voxel grid-based models in both SSIM and LPIPS on real-world scenes, while also maintaining the fastest training time. These trends are also visible in the qualitative results shown in Fig. S5, Fig. S6, and Fig. S7. These figures also include additional qualitative results both on the benchmark synthetic dataset [7] and BlurRF-Synth dataset, omitted from the main paper due to space limits.

Additionally, we report quantitative evaluation results on test sets of the BlurRF-Synth dataset, which include both camera motion blur and defocus blur. Tab. S6 and Tab. S7 present the results for each type of blur, respectively. The tables include PSNR, SSIM, and LPIPS metrics for all models across each scene. Notably, DeepDeblurRF-P and DeepDeblurRF-G consistently outperform other models across most quantitative metrics.

### References

- [1] Liangyu Chen, Xiaojie Chu, Xiangyu Zhang, and Jian Sun. Simple baselines for image restoration. In *European conference on computer vision*, pages 17–33. Springer, 2022. 1
- [2] Sara Fridovich-Keil, Alex Yu, Matthew Tancik, Qinhong Chen, Benjamin Recht, and Angjoo Kanazawa. Plenoxels: Radiance fields without neural networks. In *Proceedings of*

| Model                 | Camera motion |        |        | Defocus |        |        |
|-----------------------|---------------|--------|--------|---------|--------|--------|
|                       | PSNR          | SSIM   | LPIPS  | PSNR    | SSIM   | LPIPS  |
| Deblur-NeRF [7]       | 28.77         | 0.8593 | 0.1400 | 28.37   | 0.8527 | 0.1188 |
| DP-NeRF [5]           | 29.23         | 0.8674 | 0.1184 | 29.33   | 0.8713 | 0.0987 |
| PDRF-10 [8]           | 29.29         | 0.8798 | 0.1051 | 30.08   | 0.8931 | 0.1101 |
| Deblurring-3DGS [4]   | 28.24         | 0.8580 | 0.1048 | 29.51   | 0.8977 | 0.1015 |
| BAGS [9]              | 28.19         | 0.8516 | 0.1201 | 29.26   | 0.8983 | 0.1073 |
| <b>DeepDeblurRF-G</b> | 29.44         | 0.8811 | 0.0906 | 29.78   | 0.8992 | 0.0744 |

Table S3. Quantitative results of novel-view synthesis on the synthetic dataset of Deblur-NeRF [7]. We highlight the best metrics and the second best metrics.

- the IEEE/CVF Conference on Computer Vision and Pattern Recognition*, pages 5501–5510, 2022. 1
- [3] Bernhard Kerbl, Georgios Kopanas, Thomas Leimkühler, and George Drettakis. 3d gaussian splatting for real-time radiance field rendering. *ACM Transactions on Graphics*, 42(4):1–14, 2023. 1
  - [4] Byeonghyeon Lee, Howoong Lee, Xiangyu Sun, Usman Ali, and Eunbyung Park. Deblurring 3d gaussian splatting, 2024. 1, 4, 5, 8
  - [5] Dogyoon Lee, Minhyeok Lee, Chajin Shin, and Sangyoun Lee. Dp-nerf: Deblurred neural radiance field with physical scene priors. In *Proceedings of the IEEE/CVF Conference on Computer Vision and Pattern Recognition*, pages 12386–12396, 2023. 4, 5, 8
  - [6] Dongwoo Lee, Jeongtaek Oh, Jaesung Rim, Sunghyun Cho, and Kyoung Mu Lee. Exblurf: Efficient radiance fields for extreme motion blurred images. In *Proceedings of the IEEE/CVF International Conference on Computer Vision*, pages 17639–17648, 2023. 4, 8
  - [7] Li Ma, Xiaoyu Li, Jing Liao, Qi Zhang, Xuan Wang, Jue Wang, and Pedro V Sander. Deblur-nerf: Neural radiance fields from blurry images. In *Proceedings of the IEEE/CVF Conference on Computer Vision and Pattern Recognition*, pages 12861–12870, 2022. 2, 3, 4, 5, 7, 8, 10, 11, 12
  - [8] Cheng Peng and Rama Chellappa. Pdrf: progressively deblurring radiance field for fast scene reconstruction from blurry images. In *Proceedings of the AAAI Conference on Artificial Intelligence*, pages 2029–2037, 2023. 4, 5, 8
  - [9] Cheng Peng, Yutao Tang, Yifan Zhou, Nengyu Wang, Xijun Liu, Deming Li, and Rama Chellappa. Bags: Blur agnostic gaussian splatting through multi-scale kernel modeling, 2024. 4, 5, 8
  - [10] Jaesung Rim, Geonung Kim, Jungeon Kim, Junyong Lee, Seungyong Lee, and Sunghyun Cho. Realistic blur synthesis for learning image deblurring. In *Proceedings of the European Conference on Computer Vision (ECCV)*, 2022. 3
  - [11] Peng Wang, Lingzhe Zhao, Ruijie Ma, and Peidong Liu. Bad-nerf: Bundle adjusted deblur neural radiance fields. In *Proceedings of the IEEE/CVF Conference on Computer Vision and Pattern Recognition*, pages 4170–4179, 2023. 4, 8
  - [12] Xintao Wang, Liangbin Xie, Chao Dong, and Ying Shan. Real-esrgan: Training real-world blind super-resolution with pure synthetic data. In *International Conference on Computer Vision Workshops (ICCVW)*, 2021. 1



Table S4. Blender license information with dataset usage

| No. | Scene         | Author             | License      | Link                                                                              | Camera Motion |      | Defocus |      |
|-----|---------------|--------------------|--------------|-----------------------------------------------------------------------------------|---------------|------|---------|------|
|     |               |                    |              |                                                                                   | Train         | Test | Train   | Test |
| 1   | airplane      | fabien             | CC-BY-3.0    | <a href="https://blendswap.com/blend/15016">https://blendswap.com/blend/15016</a> | O             |      | O       |      |
| 2   | antique       | b2przemo           | CC-BY-3.0    | <a href="https://blendswap.com/blend/18909">https://blendswap.com/blend/18909</a> | O             |      | O       |      |
| 3   | applepear     | strapazie          | CC-BY-3.0    | <a href="https://blendswap.com/blend/19210">https://blendswap.com/blend/19210</a> | O             |      | O       |      |
| 4   | arts          | singroff           | CC-BY-0      | <a href="https://blendswap.com/blend/25860">https://blendswap.com/blend/25860</a> | O             |      |         |      |
| 5   | basketball    | CGMasters          | CC-BY-3.0    | <a href="https://blendswap.com/blend/14758">https://blendswap.com/blend/14758</a> | O             |      | O       |      |
| 6   | blenderroom 1 | Warcos             | CC-BY-SA-3.0 | <a href="https://blendswap.com/blend/20975">https://blendswap.com/blend/20975</a> | O             |      | O       |      |
| 7   | blenderroom 2 | Warcos             | CC-BY-SA-3.0 | <a href="https://blendswap.com/blend/20975">https://blendswap.com/blend/20975</a> | O             |      | O       |      |
| 8   | cafeteria 1   | Dennis Mg          | CC-BY-0      | <a href="https://blendswap.com/blend/31447">https://blendswap.com/blend/31447</a> | O             |      |         |      |
| 9   | cafeteria 2   | Dennis Mg          | CC-BY-0      | <a href="https://blendswap.com/blend/31447">https://blendswap.com/blend/31447</a> | O             |      |         |      |
| 10  | castle 1      | 3dfiles            | CC-BY-0      | <a href="https://blendswap.com/blend/31236">https://blendswap.com/blend/31236</a> | O             |      |         |      |
| 11  | castle 2      | 3dfiles            | CC-BY-0      | <a href="https://blendswap.com/blend/31236">https://blendswap.com/blend/31236</a> | O             |      |         |      |
| 12  | castle 3      | 3dfiles            | CC-BY-0      | <a href="https://blendswap.com/blend/31236">https://blendswap.com/blend/31236</a> | O             |      |         |      |
| 13  | classroom 1   | SwastikDas         | CC-BY-3.0    | <a href="https://blendswap.com/blend/21410">https://blendswap.com/blend/21410</a> | O             |      | O       |      |
| 14  | classroom 2   | SwastikDas         | CC-BY-3.0    | <a href="https://blendswap.com/blend/21410">https://blendswap.com/blend/21410</a> | O             |      | O       |      |
| 15  | deer          | Spine69            | CC-BY-0      | <a href="https://blendswap.com/blend/26863">https://blendswap.com/blend/26863</a> | O             |      |         |      |
| 16  | desert        | nacimus            | CC-BY-0      | <a href="https://blendswap.com/blend/26925">https://blendswap.com/blend/26925</a> | O             |      | O       |      |
| 17  | designtable   | gandre82           | CC-BY-NC     | <a href="https://blendswap.com/blend/26159">https://blendswap.com/blend/26159</a> | O             |      | O       |      |
| 18  | diningroom 1  | MaTTeSr            | CC-BY-3.0    | <a href="https://blendswap.com/blend/18762">https://blendswap.com/blend/18762</a> | O             |      | O       |      |
| 19  | diningroom 2  | MaTTeSr            | CC-BY-3.0    | <a href="https://blendswap.com/blend/18762">https://blendswap.com/blend/18762</a> | O             |      |         |      |
| 20  | drum          | bryanaJones        | CC-BY-3.0    | <a href="https://blendswap.com/blend/13383">https://blendswap.com/blend/13383</a> | O             |      | O       |      |
| 21  | entrance      | oldtimer           | CC-BY-SA-3.0 | <a href="https://blendswap.com/blend/13545">https://blendswap.com/blend/13545</a> |               | O    | O       |      |
| 22  | fireplace     | tkobyl2            | CC-BY-SA     | <a href="https://blendswap.com/blend/23941">https://blendswap.com/blend/23941</a> | O             |      |         |      |
| 23  | grasstool 1   | kevinjohnwimberly  | CC-BY-0      | <a href="https://blendswap.com/blend/31101">https://blendswap.com/blend/31101</a> | O             |      |         |      |
| 24  | grasstool 2   | kevinjohnwimberly  | CC-BY-0      | <a href="https://blendswap.com/blend/31101">https://blendswap.com/blend/31101</a> | O             |      |         |      |
| 25  | homelibrary 1 | ThePefDispenser    | CC-BY-3.0    | <a href="https://blendswap.com/blend/19984">https://blendswap.com/blend/19984</a> |               | O    | O       |      |
| 26  | homelibrary 2 | ThePefDispenser    | CC-BY-3.0    | <a href="https://blendswap.com/blend/19984">https://blendswap.com/blend/19984</a> |               | O    | O       |      |
| 27  | hotdog        | erickfree          | CC-BY-0      | <a href="https://blendswap.com/blend/23962">https://blendswap.com/blend/23962</a> | O             |      | O       |      |
| 28  | hotliving 1   | oldtimer           | CC-BY-SA-3.0 | <a href="https://blendswap.com/blend/13707">https://blendswap.com/blend/13707</a> | O             |      | O       |      |
| 29  | hotliving 2   | oldtimer           | CC-BY-SA-3.0 | <a href="https://blendswap.com/blend/13707">https://blendswap.com/blend/13707</a> | O             |      | O       |      |
| 30  | industry 1    | levigibson         | CC-BY-0      | <a href="https://blendswap.com/blend/26527">https://blendswap.com/blend/26527</a> | O             |      | O       |      |
| 31  | industry 2    | levigibson         | CC-BY-0      | <a href="https://blendswap.com/blend/26527">https://blendswap.com/blend/26527</a> | O             |      |         |      |
| 32  | industry 3    | levigibson         | CC-BY-0      | <a href="https://blendswap.com/blend/26527">https://blendswap.com/blend/26527</a> | O             |      |         |      |
| 33  | interior      | oldtimer           | CC-BY-3.0    | <a href="https://blendswap.com/blend/11624">https://blendswap.com/blend/11624</a> |               | O    |         |      |
| 34  | japan         | red0004            | CC-BY-0      | <a href="https://blendswap.com/blend/23230">https://blendswap.com/blend/23230</a> | O             |      | O       |      |
| 35  | kitchen       | Gorion             | CC-BY-SA-3.0 | <a href="https://blendswap.com/blend/10286">https://blendswap.com/blend/10286</a> | O             |      | O       |      |
| 36  | kitchenrail   | Sambor             | CC-BY-0      | <a href="https://blendswap.com/blend/31127">https://blendswap.com/blend/31127</a> | O             |      |         |      |
| 37  | LG            | AzuritHD           | CC-BY-0      | <a href="https://blendswap.com/blend/24405">https://blendswap.com/blend/24405</a> | O             |      |         |      |
| 38  | livingroom    | Rendars            | CC-BY-0      | <a href="https://blendswap.com/blend/17574">https://blendswap.com/blend/17574</a> | O             |      | O       |      |
| 39  | lotus         | Britdawgmasterfunk | CC-BY-0      | <a href="https://blendswap.com/blend/31343">https://blendswap.com/blend/31343</a> |               | O    | O       |      |
| 40  | market 1      | tokabilitor        | CC-BY-0      | <a href="https://blendswap.com/blend/8498">https://blendswap.com/blend/8498</a>   | O             |      |         |      |
| 41  | market 2      | tokabilitor        | CC-BY-0      | <a href="https://blendswap.com/blend/8498">https://blendswap.com/blend/8498</a>   | O             |      |         |      |
| 42  | markethouse   | UncleAmi           | CC-BY-0      | <a href="https://blendswap.com/blend/30651">https://blendswap.com/blend/30651</a> | O             |      | O       |      |
| 43  | military      | holmen             | CC-BY-SA-3.0 | <a href="https://blendswap.com/blend/20349">https://blendswap.com/blend/20349</a> | O             |      | O       |      |
| 44  | office        | exedesign          | CC-BY-3.0    | <a href="https://blendswap.com/blend/5402">https://blendswap.com/blend/5402</a>   | O             |      | O       |      |
| 45  | oilvinegar    | oldtimer           | CC-BY-3.0    | <a href="https://blendswap.com/blend/9549">https://blendswap.com/blend/9549</a>   | O             |      | O       |      |
| 46  | oldcar        | thecali            | CC-BY-0      | <a href="https://blendswap.com/blend/13575">https://blendswap.com/blend/13575</a> | O             |      | O       |      |
| 47  | oldphone      | oldtimer           | CC-BY-SA-3.0 | <a href="https://blendswap.com/blend/12507">https://blendswap.com/blend/12507</a> | O             |      | O       |      |
| 48  | oldroom       | oldtimer           | CC-BY-SA-3.0 | <a href="https://blendswap.com/blend/12562">https://blendswap.com/blend/12562</a> | O             |      | O       |      |
| 49  | oldtruck      | oldtimer           | CC-BY-3.0    | <a href="https://blendswap.com/blend/10372">https://blendswap.com/blend/10372</a> | O             |      | O       |      |
| 50  | payphone      | Ndakasha           | CC-BY-0      | <a href="https://blendswap.com/blend/16649">https://blendswap.com/blend/16649</a> | O             |      | O       |      |



Table S5. Blender license information with dataset usage

| No. | Scene           | Author             | License      | Link                                                                              | Camera Motion |      | Defocus |      |
|-----|-----------------|--------------------|--------------|-----------------------------------------------------------------------------------|---------------|------|---------|------|
|     |                 |                    |              |                                                                                   | Train         | Test | Train   | Test |
| 51  | pinetree        | Usch18             | CC-BY-0      | <a href="https://blendswap.com/blend/22602">https://blendswap.com/blend/22602</a> | O             |      |         |      |
| 52  | plantpot        | MZiemys            | CC-BY-1.0    | <a href="https://blendswap.com/blend/17472">https://blendswap.com/blend/17472</a> | O             |      | O       |      |
| 53  | portion         | aXel               | CC-BY-3.0    | <a href="https://blendswap.com/blend/8909">https://blendswap.com/blend/8909</a>   | O             |      | O       |      |
| 54  | prison 1        | shadows555         | CC-BY-0      | <a href="https://blendswap.com/blend/13423">https://blendswap.com/blend/13423</a> | O             |      | O       |      |
| 55  | prison 2        | shadows555         | CC-BY-0      | <a href="https://blendswap.com/blend/13423">https://blendswap.com/blend/13423</a> | O             |      | O       |      |
| 56  | readingroom     | oldtimer           | CC-BY-3.0    | <a href="https://blendswap.com/blend/11431">https://blendswap.com/blend/11431</a> | O             |      | O       |      |
| 57  | redroom 1       | Wig42              | CC-BY-3.0    | <a href="https://blendswap.com/blend/13491">https://blendswap.com/blend/13491</a> | O             |      | O       |      |
| 58  | redroom 2       | Wig42              | CC-BY-3.0    | <a href="https://blendswap.com/blend/13491">https://blendswap.com/blend/13491</a> | O             |      | O       |      |
| 59  | roots           | AceTop             | CC-BY-0      | <a href="https://blendswap.com/blend/24472">https://blendswap.com/blend/24472</a> | O             |      |         |      |
| 60  | snow            | Kaluura            | CC-BY-3.0    | <a href="https://blendswap.com/blend/7892">https://blendswap.com/blend/7892</a>   | O             |      | O       |      |
| 61  | snowroom        | akshdlfps          | CC-BY-0      | <a href="https://blendswap.com/blend/25057">https://blendswap.com/blend/25057</a> | O             |      |         |      |
| 62  | Stone           | rajatg8008         | CC-BY-0      | <a href="https://blendswap.com/blend/22490">https://blendswap.com/blend/22490</a> | O             |      | O       |      |
| 63  | sunnyroom       | ermmus             | CC-BY-3.0    | <a href="https://blendswap.com/blend/6468">https://blendswap.com/blend/6468</a>   | O             |      | O       |      |
| 64  | suv             | FA1RYDUST          | CC-BY-0      | <a href="https://blendswap.com/blend/29248">https://blendswap.com/blend/29248</a> | O             |      | O       |      |
| 65  | threejugs       | BigBadCat          | CC-BY-0      | <a href="https://blendswap.com/blend/23234">https://blendswap.com/blend/23234</a> | O             |      |         |      |
| 66  | towelrail       | gianmariaveronese  | CC-BY-3.0    | <a href="https://blendswap.com/blend/16186">https://blendswap.com/blend/16186</a> | O             |      | O       |      |
| 67  | toyfruit        | darkst0ne          | CC-BY-SA-3.0 | <a href="https://blendswap.com/blend/17890">https://blendswap.com/blend/17890</a> | O             |      | O       |      |
| 68  | Valley 1        | ShadowCrystol      | CC-BY-0      | <a href="https://blendswap.com/blend/27325">https://blendswap.com/blend/27325</a> | O             |      |         |      |
| 69  | Valley 2        | ShadowCrystol      | CC-BY-0      | <a href="https://blendswap.com/blend/27325">https://blendswap.com/blend/27325</a> | O             |      |         |      |
| 70  | woodfence       | gianmariaveronese  | CC-BY-3.0    | <a href="https://blendswap.com/blend/16218">https://blendswap.com/blend/16218</a> | O             |      |         |      |
| 71  | aloe            | dbar               | CC-BY-0      | <a href="https://blendswap.com/blend/29333">https://blendswap.com/blend/29333</a> |               |      | O       |      |
| 72  | axe             | Mukhammad          | CC-BY-0      | <a href="https://blendswap.com/blend/28884">https://blendswap.com/blend/28884</a> |               |      | O       |      |
| 73  | brownbathroom   | imperfection.png   | CC-BY-0      | <a href="https://blendswap.com/blend/29184">https://blendswap.com/blend/29184</a> |               |      | O       |      |
| 74  | cactus          | Prokster           | CC-BY-0      | <a href="https://blendswap.com/blend/27983">https://blendswap.com/blend/27983</a> |               |      | O       |      |
| 75  | champagne       | Teleport3d         | CC-BY-3.0    | <a href="https://blendswap.com/blend/28262">https://blendswap.com/blend/28262</a> |               |      | O       |      |
| 76  | chocolate       | Bagoule            | CC-BY-0      | <a href="https://blendswap.com/blend/30805">https://blendswap.com/blend/30805</a> |               |      | O       |      |
| 77  | computer        | Supper800          | CC-BY-3.0    | <a href="https://blendswap.com/blend/28505">https://blendswap.com/blend/28505</a> |               |      | O       |      |
| 78  | hobbyroom       | muhuk              | CC-BY-0      | <a href="https://blendswap.com/blend/28537">https://blendswap.com/blend/28537</a> |               |      | O       |      |
| 79  | jungle gym      | DoiMoi             | CC-BY-0      | <a href="https://blendswap.com/blend/30371">https://blendswap.com/blend/30371</a> |               |      | O       |      |
| 80  | kitcheninterior | Mukhammad          | CC-BY-3.0    | <a href="https://blendswap.com/blend/28822">https://blendswap.com/blend/28822</a> |               |      | O       |      |
| 81  | oldoak          | manoh              | CC-BY-0      | <a href="https://blendswap.com/blend/19222">https://blendswap.com/blend/19222</a> |               |      | O       |      |
| 82  | range           | Ginibird           | CC-BY-3.0    | <a href="https://blendswap.com/blend/29247">https://blendswap.com/blend/29247</a> |               |      | O       |      |
| 83  | recyclebin      | jamesstar          | CC-BY-0      | <a href="https://blendswap.com/blend/30905">https://blendswap.com/blend/30905</a> |               |      | O       |      |
| 84  | salon           | carmule            | CC-BY-0      | <a href="https://blendswap.com/blend/30615">https://blendswap.com/blend/30615</a> |               |      | O       |      |
| 85  | samosas         | Hope               | CC-BY-0      | <a href="https://blendswap.com/blend/28022">https://blendswap.com/blend/28022</a> |               |      | O       |      |
| 86  | scissors        | salimrached        | CC-BY-0      | <a href="https://blendswap.com/blend/27712">https://blendswap.com/blend/27712</a> |               |      | O       |      |
| 87  | shaving         | narmoo             | CC-BY-3.0    | <a href="https://blendswap.com/blend/30020">https://blendswap.com/blend/30020</a> |               |      | O       |      |
| 88  | teaset          | SavageIndie        | CC-BY-3.0    | <a href="https://blendswap.com/blend/28729">https://blendswap.com/blend/28729</a> |               |      | O       |      |
| 89  | trophies        | ScreamingOrange    | CC-BY-0      | <a href="https://blendswap.com/blend/27622">https://blendswap.com/blend/27622</a> |               |      | O       |      |
| 90  | victorianoffice | Teleport3d         | CC-BY-3.0    | <a href="https://blendswap.com/blend/28382">https://blendswap.com/blend/28382</a> |               |      | O       |      |
| 91  | garage          | Bagoule            | CC-BY-0      | <a href="https://blendswap.com/blend/31126">https://blendswap.com/blend/31126</a> |               |      |         | O    |
| 92  | key             | raven0246          | CC-BY-NC-3.0 | <a href="https://blendswap.com/blend/20439">https://blendswap.com/blend/20439</a> |               |      |         | O    |
| 93  | paintingroom    | celoaz             | CC-BY-1.0    | <a href="https://blendswap.com/blend/17967">https://blendswap.com/blend/17967</a> |               |      |         | O    |
| 94  | shotgun         | Britdawgmasterfunk | CC-BY-0      | <a href="https://blendswap.com/blend/30712">https://blendswap.com/blend/30712</a> |               |      |         | O    |
| 95  | swimmingpool    | BlenderByte        | CC-BY-3.0    | <a href="https://blendswap.com/blend/15015">https://blendswap.com/blend/15015</a> |               |      |         | O    |
| 96  | cozyroom        | Deblur-NeRF [7]    |              |                                                                                   |               | O    |         | O    |
| 97  | factory         | Deblur-NeRF [7]    |              |                                                                                   |               | O    |         | O    |
| 98  | pool            | Deblur-NeRF [7]    |              |                                                                                   |               | O    |         | O    |
| 99  | tanabata        | Deblur-NeRF [7]    |              |                                                                                   |               | O    |         | O    |
| 100 | wine            | Deblur-NeRF [7]    |              |                                                                                   |               | O    |         | O    |

Total Blender Models: 100

Camera Motion Blur: Train (65), Test (10)

Defocus Blur: Train (65), Test (10)



Table S6. Quantitative results of novel-view synthesis on the camera motion blur test set of BlurRF-Synth. We highlight the best metrics and the second best metrics .

| Model                        | Cozyroom        |                 |                    | Factory         |                 |                    | Pool            |                 |                    | Tanabata        |                 |                    | Wine            |                 |                    |
|------------------------------|-----------------|-----------------|--------------------|-----------------|-----------------|--------------------|-----------------|-----------------|--------------------|-----------------|-----------------|--------------------|-----------------|-----------------|--------------------|
|                              | PSNR $\uparrow$ | SSIM $\uparrow$ | LPIPS $\downarrow$ | PSNR $\uparrow$ | SSIM $\uparrow$ | LPIPS $\downarrow$ | PSNR $\uparrow$ | SSIM $\uparrow$ | LPIPS $\downarrow$ | PSNR $\uparrow$ | SSIM $\uparrow$ | LPIPS $\downarrow$ | PSNR $\uparrow$ | SSIM $\uparrow$ | LPIPS $\downarrow$ |
| Deblur-NeRF [7]              | 27.39           | 0.8577          | 0.1155             | 22.84           | 0.7648          | 0.2083             | 30.22           | 0.8206          | 0.1896             | 22.14           | 0.7764          | 0.1747             | 23.58           | 0.7967          | 0.1336             |
| BAD-NeRF [11]                | 19.46           | 0.4487          | 0.5098             | 15.85           | 0.3379          | 0.5447             | 22.89           | 0.4483          | 0.5675             | 13.29           | 0.2532          | 0.6184             | 21.19           | 0.7062          | 0.1685             |
| DP-NeRF [5]                  | 27.59           | 0.8611          | 0.1021             | 23.14           | 0.7764          | 0.1897             | 30.51           | 0.8246          | 0.1683             | 22.72           | 0.7889          | 0.1517             | 24.01           | 0.8045          | 0.1187             |
| ExBluRF [6]                  | 25.97           | 0.8118          | 0.1398             | 20.01           | 0.6824          | 0.2577             | 29.05           | 0.7589          | 0.3370             | 20.88           | 0.7072          | 0.1991             | 20.78           | 0.7014          | 0.2101             |
| PDRF-10 [8]                  | 27.91           | 0.8607          | 0.1008             | 26.13           | 0.8298          | 0.1839             | 29.16           | 0.7960          | 0.2254             | 23.94           | 0.8191          | 0.1491             | 24.79           | 0.8271          | 0.1170             |
| Deblur-GS [4]                | 27.60           | 0.8321          | 0.1059             | 21.54           | 0.6683          | 0.2261             | 28.26           | 0.7530          | 0.2339             | 21.83           | 0.7112          | 0.1859             | 22.67           | 0.7664          | 0.1251             |
| BAGS [9]                     | 27.69           | 0.8429          | 0.0896             | 22.89           | 0.7386          | 0.2045             | 28.33           | 0.7514          | 0.2016             | 23.82           | 0.7771          | 0.1587             | 24.34           | 0.8160          | 0.1021             |
| <b>DeepDeblurRF-P (Ours)</b> | 29.74           | 0.8732          | 0.0665             | 24.65           | 0.8128          | 0.1706             | 31.25           | 0.8389          | 0.1609             | 25.30           | 0.8450          | 0.1270             | 25.63           | 0.8532          | 0.1073             |
| <b>DeepDeblurRF-G (Ours)</b> | 30.02           | 0.8887          | 0.0728             | 24.87           | 0.8030          | 0.1599             | 31.04           | 0.8367          | 0.1468             | 25.81           | 0.8529          | 0.1043             | 25.66           | 0.8532          | 0.0887             |
| Model                        | Entrance        |                 |                    | Homelibrary 1   |                 |                    | Interior        |                 |                    | Lotus           |                 |                    | Homelibrary 2   |                 |                    |
|                              | PSNR $\uparrow$ | SSIM $\uparrow$ | LPIPS $\downarrow$ | PSNR $\uparrow$ | SSIM $\uparrow$ | LPIPS $\downarrow$ | PSNR $\uparrow$ | SSIM $\uparrow$ | LPIPS $\downarrow$ | PSNR $\uparrow$ | SSIM $\uparrow$ | LPIPS $\downarrow$ | PSNR $\uparrow$ | SSIM $\uparrow$ | LPIPS $\downarrow$ |
| Deblur-NeRF [7]              | 31.45           | 0.9167          | 0.0693             | 29.65           | 0.8241          | 0.1335             | 32.03           | 0.9086          | 0.1088             | 29.77           | 0.8356          | 0.1884             | 27.62           | 0.8383          | 0.1283             |
| BAD-NeRF [11]                | 21.77           | 0.6295          | 0.2261             | 28.51           | 0.7672          | 0.1916             | 30.46           | 0.8641          | 0.1402             | 24.20           | 0.4690          | 0.4773             | 19.77           | 0.3739          | 0.5249             |
| DP-NeRF [5]                  | 31.90           | 0.9217          | 0.0585             | 30.04           | 0.8266          | 0.1153             | 32.18           | 0.9108          | 0.0960             | 30.33           | 0.8532          | 0.1613             | 27.83           | 0.8437          | 0.1057             |
| ExBluRF [6]                  | 31.24           | 0.8960          | 0.0846             | 29.41           | 0.7970          | 0.1553             | 31.84           | 0.8917          | 0.1165             | 29.29           | 0.8077          | 0.2559             | 27.09           | 0.7688          | 0.1986             |
| PDRF-10 [8]                  | 31.75           | 0.9143          | 0.0803             | 30.34           | 0.8318          | 0.1510             | 31.58           | 0.9043          | 0.1098             | 30.08           | 0.8325          | 0.2330             | 27.61           | 0.8193          | 0.1447             |
| Deblur-GS [4]                | 28.93           | 0.8669          | 0.1005             | 27.17           | 0.7539          | 0.1761             | 29.70           | 0.8360          | 0.1660             | 28.51           | 0.7895          | 0.2561             | 26.82           | 0.7520          | 0.1527             |
| BAGS [9]                     | 30.81           | 0.9012          | 0.0676             | 29.66           | 0.8224          | 0.1097             | 30.52           | 0.8763          | 0.1220             | 29.03           | 0.8068          | 0.2081             | 27.04           | 0.7754          | 0.1182             |
| <b>DeepDeblurRF-P (Ours)</b> | 34.13           | 0.9428          | 0.0431             | 31.77           | 0.8495          | 0.1227             | 34.21           | 0.9441          | 0.0578             | 31.58           | 0.8626          | 0.1764             | 29.82           | 0.8462          | 0.1098             |
| <b>DeepDeblurRF-G (Ours)</b> | 32.52           | 0.9321          | 0.0542             | 32.20           | 0.8373          | 0.1378             | 35.70           | 0.9554          | 0.0516             | 31.40           | 0.8518          | 0.1631             | 30.19           | 0.8696          | 0.0795             |

Table S7. Quantitative results of novel-view synthesis on the defocus blur test set of BlurRF-Synth. We highlight the best metrics and the second best metrics .

| Model                        | Cozyroom        |                 |                    | Factory         |                 |                    | Garage          |                 |                    | Key             |                 |                    | Paintingroom    |                 |                    |
|------------------------------|-----------------|-----------------|--------------------|-----------------|-----------------|--------------------|-----------------|-----------------|--------------------|-----------------|-----------------|--------------------|-----------------|-----------------|--------------------|
|                              | PSNR $\uparrow$ | SSIM $\uparrow$ | LPIPS $\downarrow$ | PSNR $\uparrow$ | SSIM $\uparrow$ | LPIPS $\downarrow$ | PSNR $\uparrow$ | SSIM $\uparrow$ | LPIPS $\downarrow$ | PSNR $\uparrow$ | SSIM $\uparrow$ | LPIPS $\downarrow$ | PSNR $\uparrow$ | SSIM $\uparrow$ | LPIPS $\downarrow$ |
| Deblur-NeRF [7]              | 29.77           | 0.8941          | 0.0744             | 25.69           | 0.8503          | 0.1289             | 31.84           | 0.8818          | 0.1183             | 33.08           | 0.9136          | 0.0653             | 34.98           | 0.9438          | 0.0403             |
| BAD-NeRF [11]                | -               | -               | -                  | -               | -               | -                  | -               | -               | -                  | -               | -               | -                  | -               | -               | -                  |
| DP-NeRF [5]                  | 29.62           | 0.8911          | 0.0650             | 25.71           | 0.8538          | 0.1127             | 31.80           | 0.8819          | 0.1124             | 32.44           | 0.9024          | 0.0619             | 34.64           | 0.9410          | 0.0369             |
| ExBluRF [6]                  | -               | -               | -                  | -               | -               | -                  | -               | -               | -                  | -               | -               | -                  | -               | -               | -                  |
| PDRF-10 [8]                  | 29.06           | 0.8804          | 0.0783             | 27.92           | 0.8731          | 0.1218             | 31.77           | 0.8833          | 0.1208             | 31.99           | 0.8814          | 0.0895             | 33.05           | 0.9215          | 0.0785             |
| Deblur-GS [4]                | 27.54           | 0.8542          | 0.1158             | 26.50           | 0.8584          | 0.1568             | 31.55           | 0.8532          | 0.1555             | 31.27           | 0.8555          | 0.1391             | 33.50           | 0.9262          | 0.0679             |
| BAGS [9]                     | 30.45           | 0.8852          | 0.0613             | 27.75           | 0.8881          | 0.1065             | 32.16           | 0.8839          | 0.1323             | 30.07           | 0.8081          | 0.1682             | 33.70           | 0.9312          | 0.0437             |
| <b>DeepDeblurRF-P (Ours)</b> | 31.47           | 0.9149          | 0.0552             | 29.33           | 0.9008          | 0.1019             | 33.90           | 0.9099          | 0.1037             | 36.85           | 0.9544          | 0.0505             | 38.19           | 0.9660          | 0.0246             |
| <b>DeepDeblurRF-G (Ours)</b> | 31.33           | 0.9117          | 0.0505             | 28.06           | 0.9088          | 0.0674             | 34.63           | 0.9162          | 0.0695             | 38.06           | 0.9600          | 0.0478             | 39.41           | 0.9720          | 0.0201             |
| Model                        | Pool            |                 |                    | Shotgun         |                 |                    | Swimmingpool    |                 |                    | Tanabata        |                 |                    | Wine            |                 |                    |
|                              | PSNR $\uparrow$ | SSIM $\uparrow$ | LPIPS $\downarrow$ | PSNR $\uparrow$ | SSIM $\uparrow$ | LPIPS $\downarrow$ | PSNR $\uparrow$ | SSIM $\uparrow$ | LPIPS $\downarrow$ | PSNR $\uparrow$ | SSIM $\uparrow$ | LPIPS $\downarrow$ | PSNR $\uparrow$ | SSIM $\uparrow$ | LPIPS $\downarrow$ |
| Deblur-NeRF [7]              | 31.10           | 0.8513          | 0.1582             | 34.80           | 0.9534          | 0.0661             | 32.53           | 0.8613          | 0.1583             | 23.19           | 0.7924          | 0.1614             | 23.30           | 0.7848          | 0.1661             |
| BAD-NeRF [11]                | -               | -               | -                  | -               | -               | -                  | -               | -               | -                  | -               | -               | -                  | -               | -               | -                  |
| DP-NeRF [5]                  | 31.61           | 0.8627          | 0.1185             | 34.62           | 0.9521          | 0.0560             | 33.08           | 0.8672          | 0.1392             | 23.90           | 0.8098          | 0.1458             | 24.11           | 0.8014          | 0.1421             |
| ExBluRF [6]                  | -               | -               | -                  | -               | -               | -                  | -               | -               | -                  | -               | -               | -                  | -               | -               | -                  |
| PDRF-10 [8]                  | 30.14           | 0.8414          | 0.1711             | 33.69           | 0.9406          | 0.1099             | 32.71           | 0.8633          | 0.1710             | 25.05           | 0.8373          | 0.1414             | 24.93           | 0.8281          | 0.1428             |
| Deblur-GS [4]                | 29.74           | 0.8219          | 0.1814             | 33.98           | 0.9435          | 0.0757             | 32.49           | 0.8510          | 0.2114             | 22.80           | 0.7776          | 0.2056             | 24.29           | 0.8036          | 0.1611             |
| BAGS [9]                     | 29.36           | 0.8217          | 0.1336             | 33.58           | 0.9407          | 0.0687             | 32.06           | 0.8559          | 0.1815             | 24.85           | 0.7998          | 0.1359             | 24.98           | 0.8231          | 0.1203             |
| <b>DeepDeblurRF-P (Ours)</b> | 33.01           | 0.8865          | 0.1317             | 37.26           | 0.9673          | 0.0418             | 34.79           | 0.8749          | 0.1759             | 25.22           | 0.8457          | 0.1353             | 25.03           | 0.8376          | 0.1406             |
| <b>DeepDeblurRF-G (Ours)</b> | 31.55           | 0.8641          | 0.1044             | 38.89           | 0.9727          | 0.0361             | 34.69           | 0.8762          | 0.1637             | 24.78           | 0.8487          | 0.0995             | 24.42           | 0.8294          | 0.1147             |



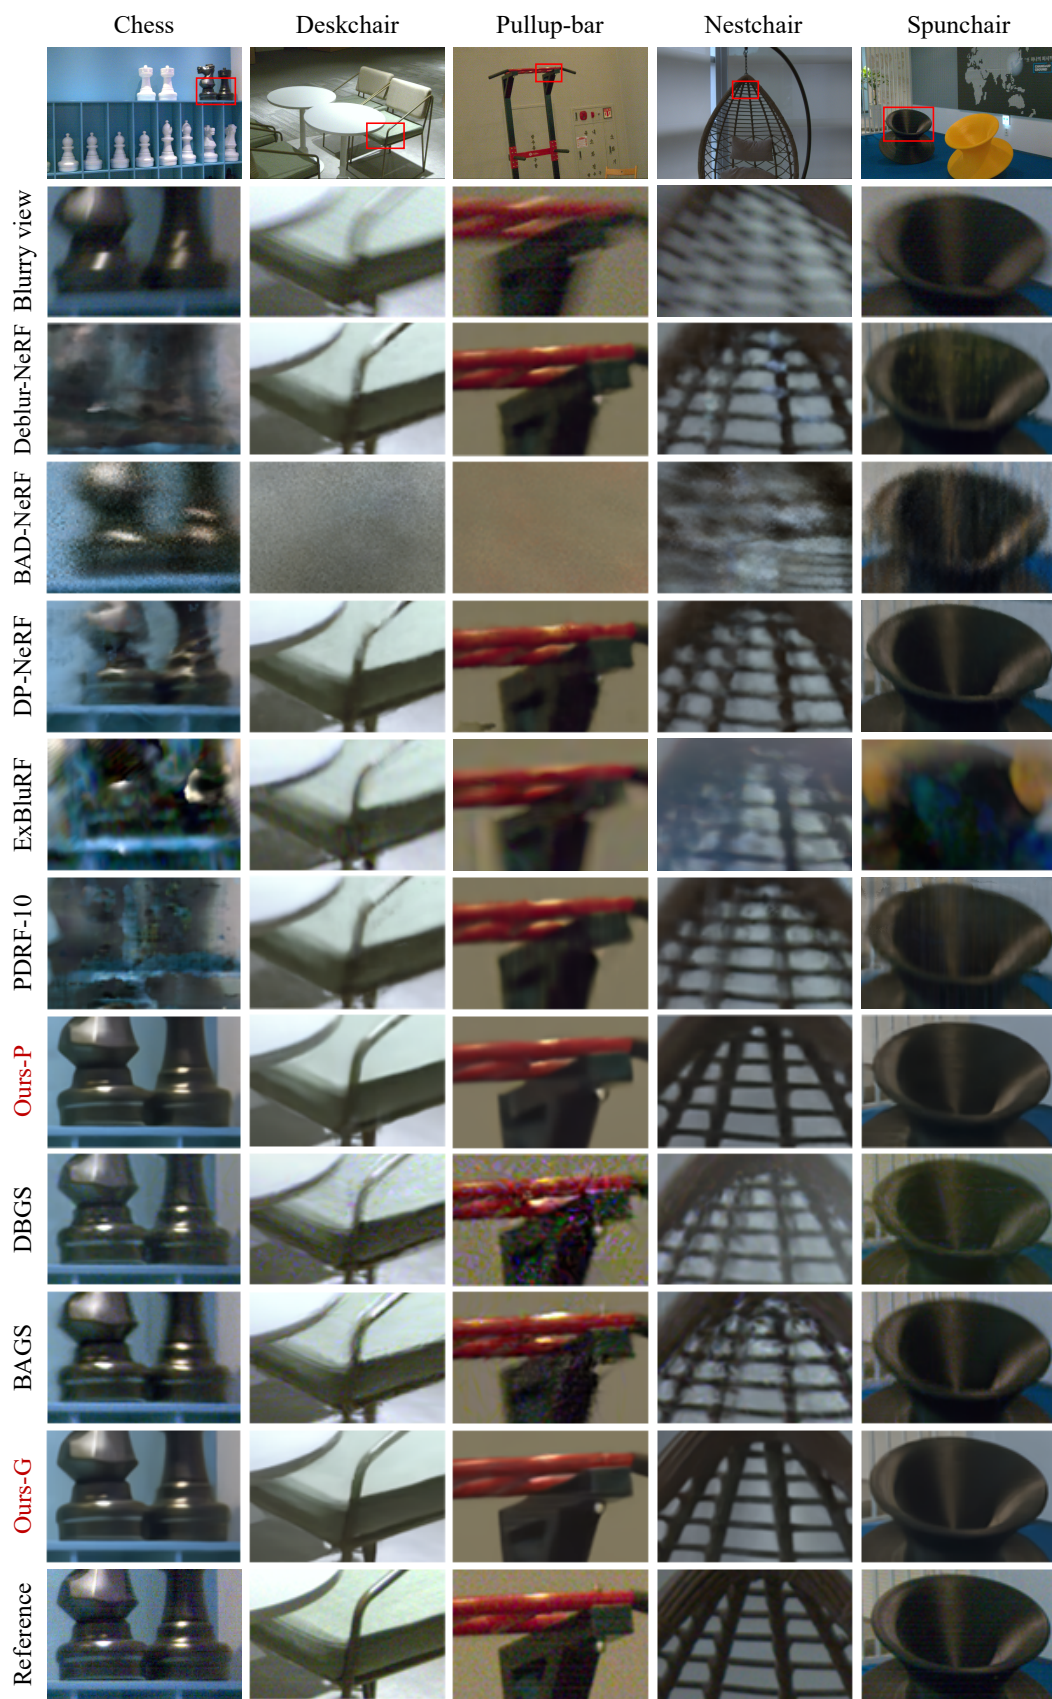

Figure S4. Qualitative comparison of novel-view synthesis on the BlurRF-Real dataset.



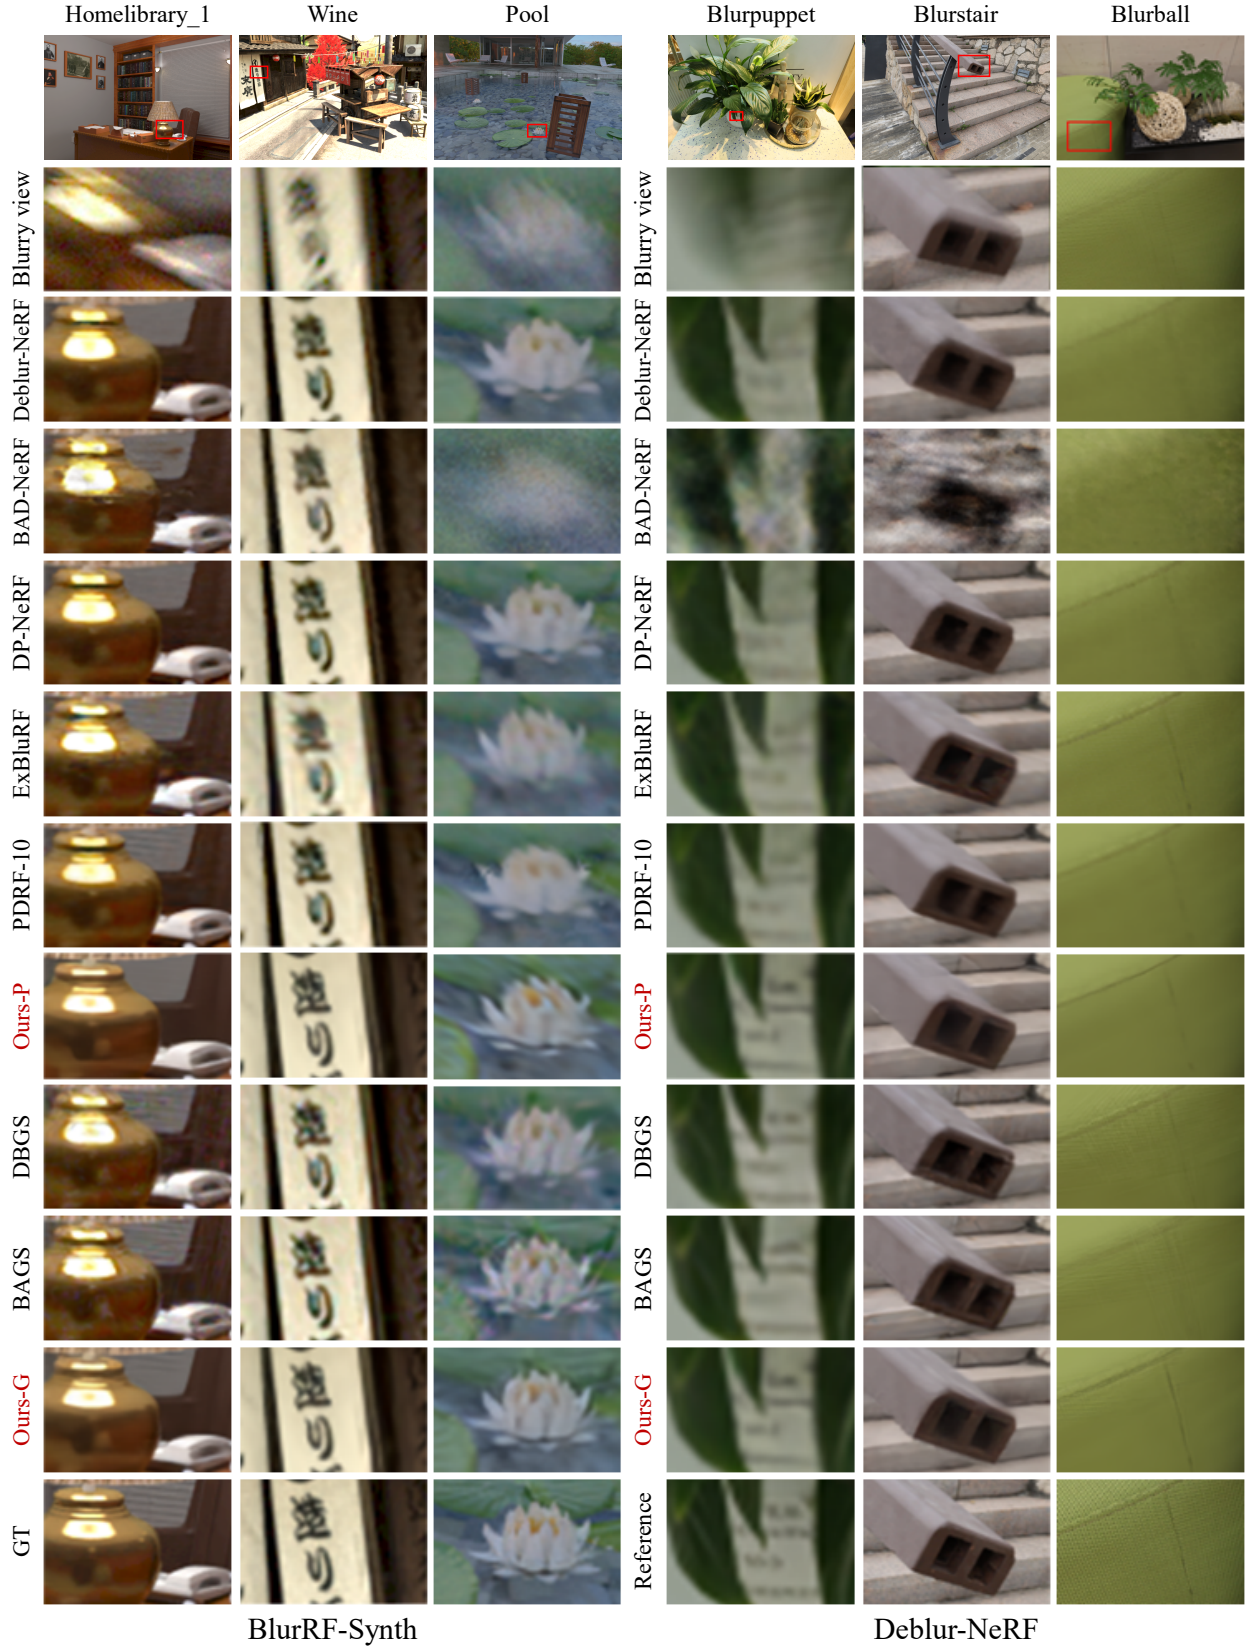

Figure S5. Qualitative comparison of novel-view synthesis on camera motion blur datasets. The left three columns show results on the test set of BlurRF-Synth, and the right three columns show real-world scenes of Deblur-NeRF [7].



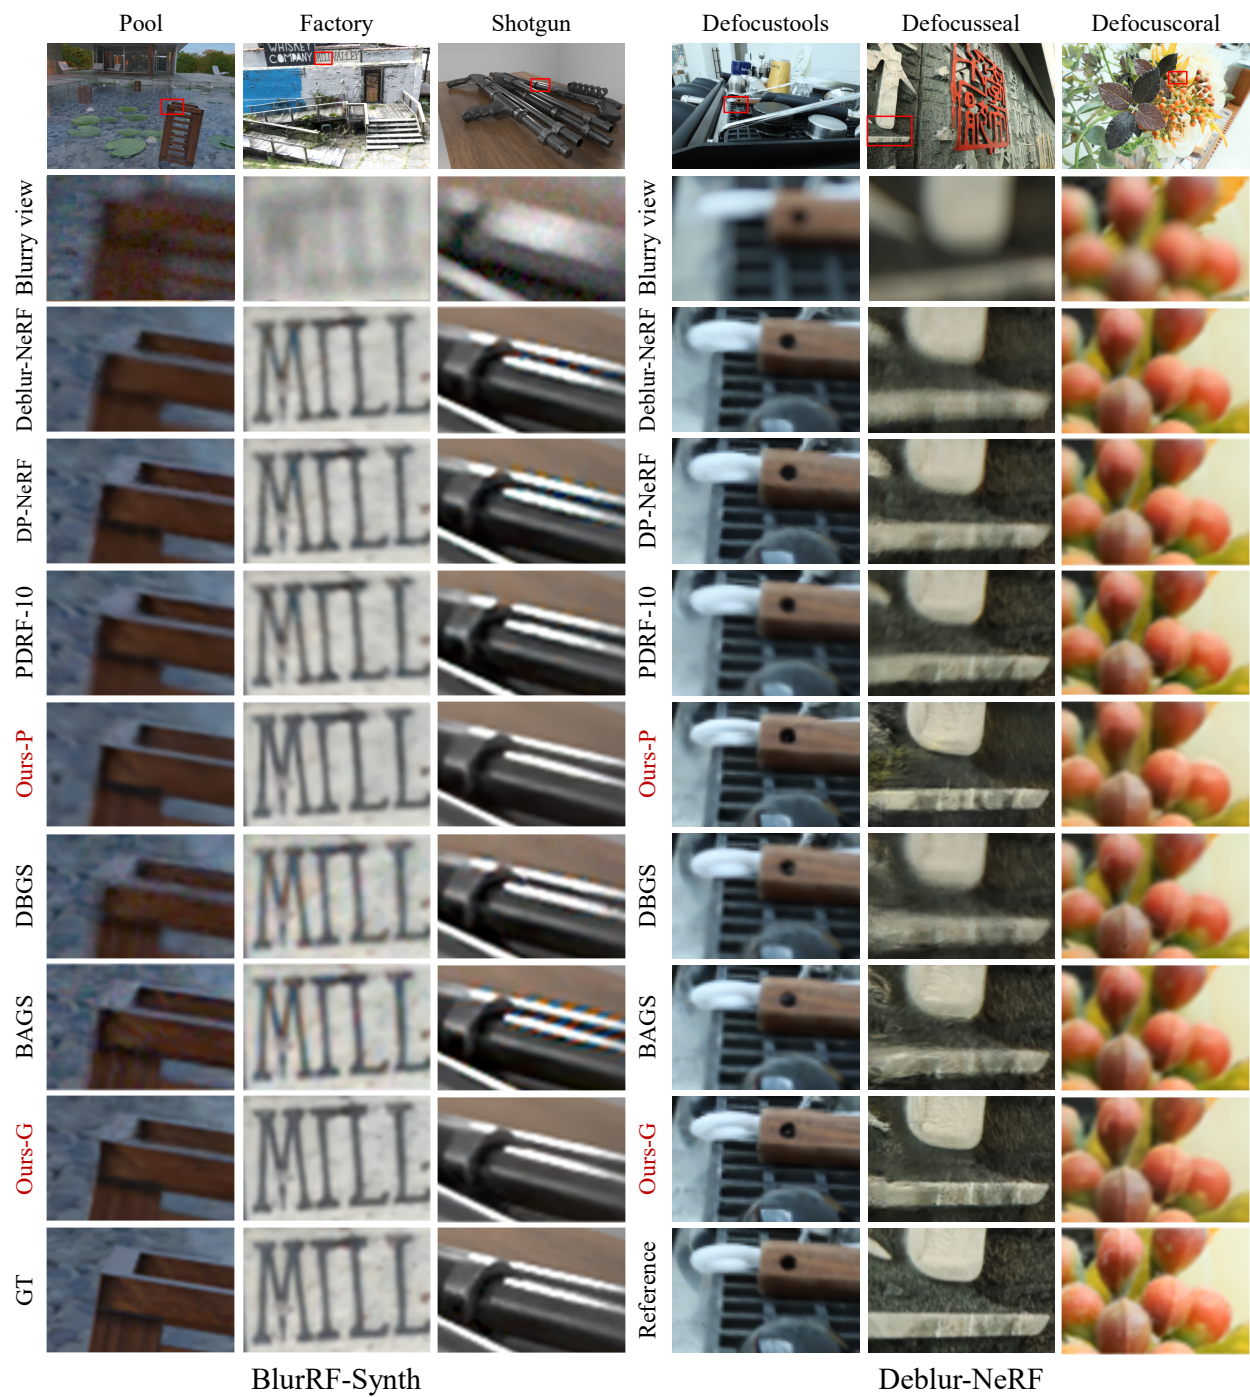

Figure S6. Qualitative comparison of novel-view synthesis on defocus blur datasets. The left three columns show results on the test set of BlurRF-Synth, and the right three columns show real-world scenes of Deblur-NeRF [7].



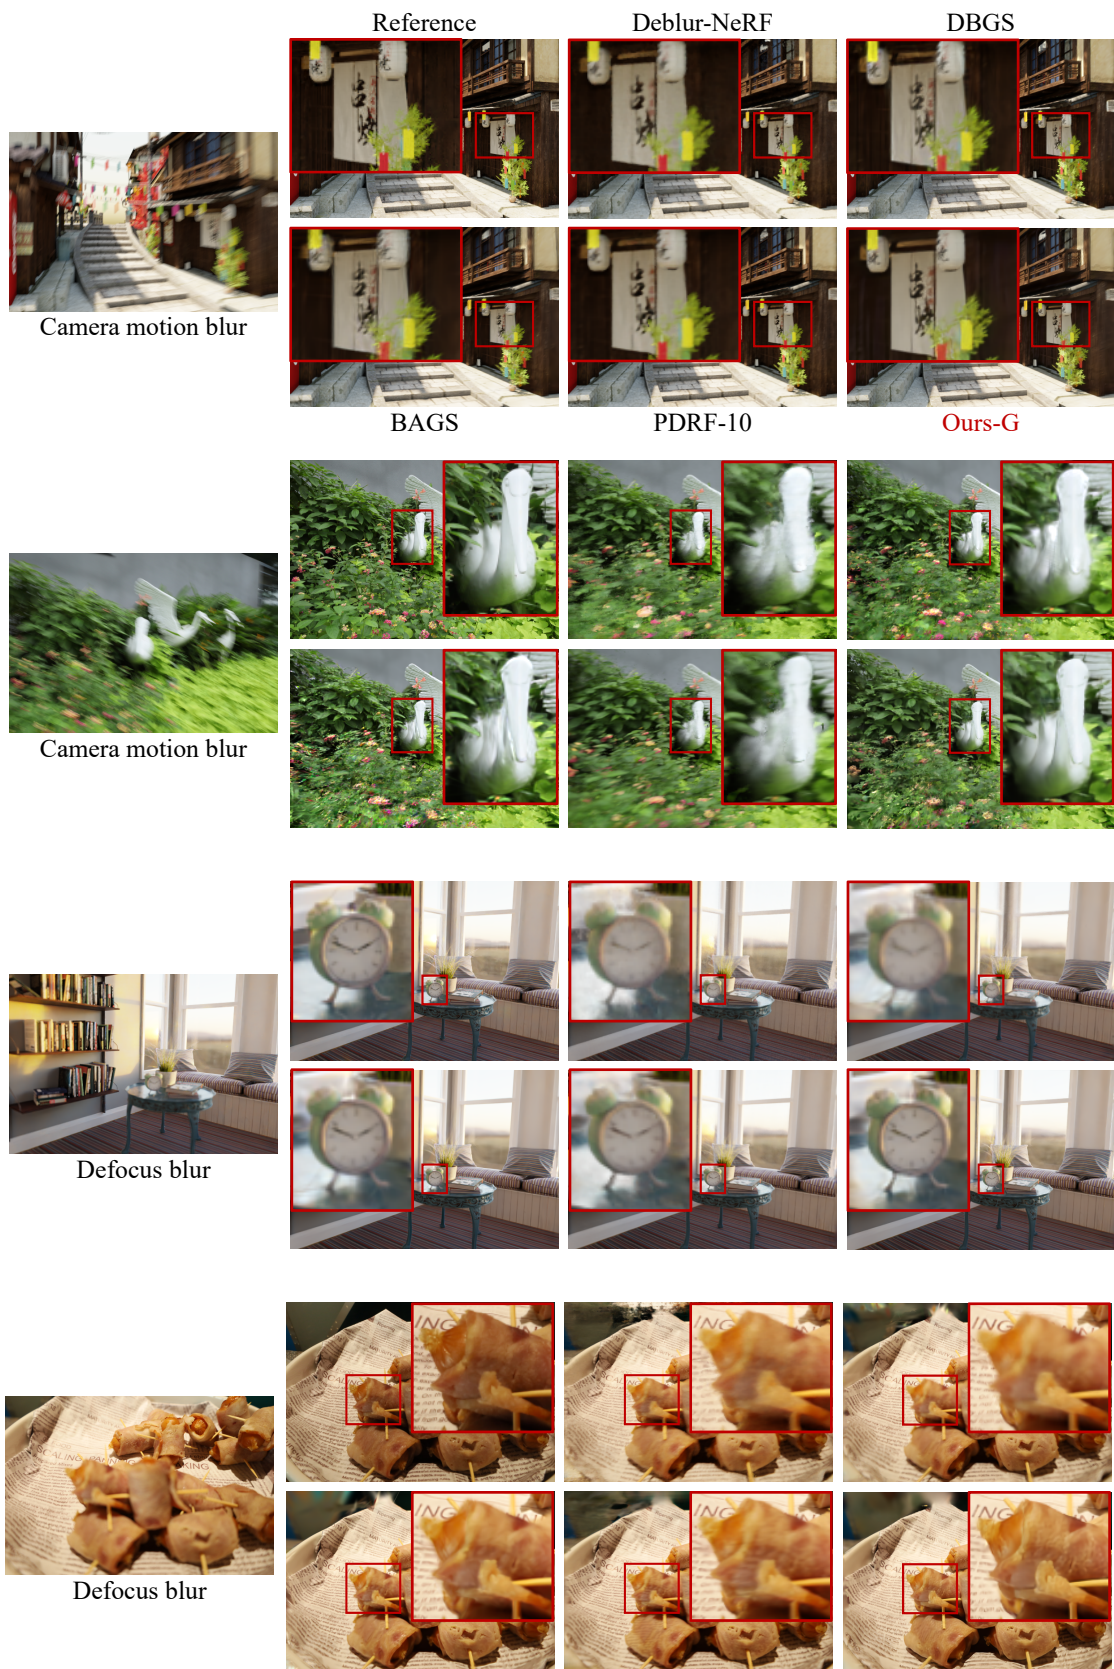

Figure S7. Qualitative comparison of novel-view synthesis on benchmark datasets [7].
